# Supplementary material
Source: PubMed Central journal article supplement (PMC8207103)
Supplement: MJA2-214-462-s001.pdf [file MJA2-214-462-s001.pdf]

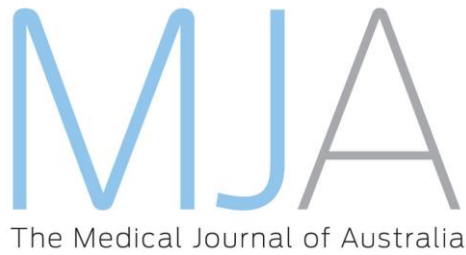

## **Supporting Information**

### **Supplementary results**

**This appendix was part of the submitted manuscript and has been peer reviewed.  
It is posted as supplied by the authors.**

Appendix to: Batterham PJ, Calear AL, McCallum SM, et al. Trajectories of depression and anxiety symptoms during the COVID-19 pandemic in a representative Australian adult cohort. *Med J Aust* 2021; doi: 10.5694/mja2.51043.

**Figure. Symptoms of depression (PHQ-9) and anxiety (GAD-7): raw means and estimated means from quadratic growth curves (with standard deviations) (off-set for clarity)\***

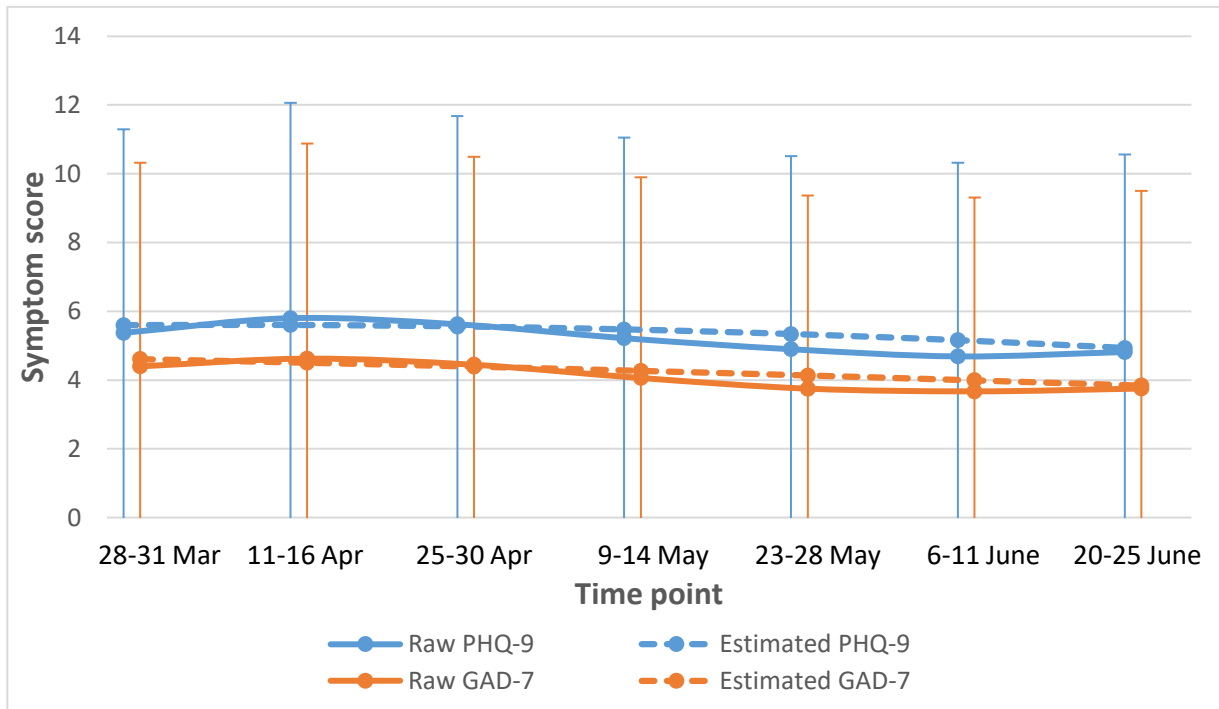

\* The linear change parameters were not significant for either outcome (PHQ-9: estimate, 0.028 scale units,  $P = 0.68$ ; GAD-7: estimate,  $-0.099$  units,  $P = 0.10$ ). However, the quadratic change parameter was significant for depression symptoms (estimate,  $-0.023$  units,  $P = 0.026$ ) but not anxiety symptoms (estimate,  $-0.005$  units,  $P = 0.55$ ), indicating that depression symptoms declined more in later weeks.

Table 1. Predictors of intercept, linear change, and quadratic change: symptoms of depression (PHQ-9) and generalised anxiety (GAD-7)

|                       | PHQ-9     |       |              |               |       |      |                  |       |              | GAD-7     |       |              |               |       |              |                  |       |      |
|-----------------------|-----------|-------|--------------|---------------|-------|------|------------------|-------|--------------|-----------|-------|--------------|---------------|-------|--------------|------------------|-------|------|
|                       | Intercept |       |              | Linear change |       |      | Quadratic change |       |              | Intercept |       |              | Linear change |       |              | Quadratic change |       |      |
|                       | Estimate* | SE    | P            | Estimate*     | SE    | P    | Estimate*        | SE    | P            | Estimate* | SE    | P            | Estimate*     | SE    | P            | Estimate*        | SE    | P    |
| Age                   | -0.054    | 0.009 | < 0.001      | -0.006        | 0.005 | 0.25 | 0.001            | 0.001 | 0.37         | -0.046    | 0.008 | < 0.001      | 0.000         | 0.004 | 0.91         | 0.000            | 0.001 | 0.88 |
| WSAS score            | 0.113     | 0.016 | < 0.001      | 0.009         | 0.008 | 0.28 | -0.002           | 0.001 | 0.10         | 0.087     | 0.014 | < 0.001      | 0.010         | 0.007 | 0.18         | -0.002           | 0.001 | 0.11 |
| COVID-19 exposure     | 0.217     | 0.156 | 0.16         | 0.129         | 0.082 | 0.12 | -0.028           | 0.013 | <b>0.028</b> | 0.075     | 0.138 | 0.59         | 0.082         | 0.073 | 0.26         | -0.015           | 0.011 | 0.17 |
| Education years       | -0.119    | 0.074 | 0.11         | -0.018        | 0.039 | 0.64 | 0.004            | 0.006 | 0.50         | -0.058    | 0.066 | 0.38         | 0.005         | 0.035 | 0.90         | -0.002           | 0.005 | 0.72 |
| Lost job              | 0.009     | 0.475 | 0.98         | 0.219         | 0.274 | 0.42 | -0.031           | 0.043 | 0.48         | 0.025     | 0.423 | 0.95         | 0.243         | 0.246 | 0.32         | -0.029           | 0.039 | 0.45 |
| Work from home        | -0.178    | 0.408 | 0.66         | -0.171        | 0.211 | 0.42 | 0.042            | 0.032 | 0.19         | 0.293     | 0.361 | 0.42         | -0.371        | 0.188 | <b>0.049</b> | 0.056            | 0.029 | 0.05 |
| Female vs male        | 0.832     | 0.262 | <b>0.002</b> | -0.243        | 0.136 | 0.07 | 0.015            | 0.021 | 0.46         | 1.035     | 0.232 | < 0.001      | -0.372        | 0.122 | <b>0.002</b> | 0.034            | 0.019 | 0.07 |
| Physical disease      | 0.571     | 0.306 | 0.06         | 0.101         | 0.153 | 0.51 | -0.023           | 0.024 | 0.33         | 0.504     | 0.270 | 0.06         | -0.107        | 0.137 | 0.44         | 0.011            | 0.021 | 0.61 |
| Neurological disorder | 1.730     | 0.424 | < 0.001      | -0.333        | 0.210 | 0.11 | 0.038            | 0.032 | 0.24         | 1.046     | 0.374 | <b>0.005</b> | 0.082         | 0.187 | 0.66         | -0.029           | 0.028 | 0.30 |
| Mental disorder       | 4.122     | 0.322 | < 0.001      | -0.230        | 0.167 | 0.17 | 0.032            | 0.026 | 0.22         | 3.658     | 0.284 | < 0.001      | -0.256        | 0.149 | 0.08         | 0.028            | 0.023 | 0.23 |
| Have partner          | -0.412    | 0.311 | 0.19         | 0.087         | 0.168 | 0.60 | -0.029           | 0.026 | 0.27         | 0.206     | 0.276 | 0.46         | -0.123        | 0.150 | 0.41         | 0.003            | 0.023 | 0.90 |
| Live alone            | 0.453     | 0.441 | 0.30         | -0.216        | 0.225 | 0.34 | 0.021            | 0.035 | 0.55         | -0.128    | 0.390 | 0.74         | -0.148        | 0.201 | 0.46         | 0.019            | 0.031 | 0.53 |
| Live with children    | -0.120    | 0.294 | 0.68         | 0.055         | 0.155 | 0.72 | -0.019           | 0.024 | 0.42         | 0.157     | 0.261 | 0.55         | -0.103        | 0.139 | 0.46         | 0.000            | 0.021 | 1.00 |
| Bushfire-smoke        | 0.203     | 0.258 | 0.43         | 0.062         | 0.133 | 0.64 | -0.009           | 0.021 | 0.65         | 0.051     | 0.228 | 0.82         | 0.095         | 0.119 | 0.42         | -0.016           | 0.018 | 0.38 |
| Bushfire-fire         | -0.211    | 0.463 | 0.65         | 0.377         | 0.244 | 0.12 | -0.040           | 0.038 | 0.30         | -0.396    | 0.410 | 0.33         | -0.140        | 0.218 | 0.52         | 0.049            | 0.034 | 0.14 |
| Other adversity       | 1.941     | 0.329 | < 0.001      | -0.117        | 0.174 | 0.50 | 0.015            | 0.027 | 0.59         | 1.445     | 0.292 | < 0.001      | 0.010         | 0.155 | 0.95         | 0.001            | 0.024 | 0.96 |
| Financial distress    | 2.600     | 0.306 | < 0.001      | -0.116        | 0.161 | 0.47 | -0.002           | 0.025 | 0.93         | 2.389     | 0.271 | < 0.001      | -0.068        | 0.144 | 0.64         | -0.012           | 0.022 | 0.58 |

COVID-19 = coronavirus disease 2019; GAD-7 = Generalised Anxiety Disorder-7; PHQ-9 = Patient Health Questionnaire-9; WSAS = Work and Social Adjustment.

\* Unstandardised estimate.

**Table 2. Estimates of intercept, linear change and quadratic change for each trajectory, estimated from growth mixture models**

| Trajectory (latent class)            | Intercept (initial score) |       |                  | Linear change |       |                  | Quadratic change |       |                  |
|--------------------------------------|---------------------------|-------|------------------|---------------|-------|------------------|------------------|-------|------------------|
|                                      | Estimate                  | SE    | p                | Estimate      | SE    | p                | Estimate         | SE    | p                |
| <b>Depression - low</b>              | 3.367                     | 0.201 | <b>&lt;0.001</b> | 0.343         | 0.088 | <b>&lt;0.001</b> | -0.074           | 0.012 | <b>&lt;0.001</b> |
| <b>Depression - moderate</b>         | 10.939                    | 1.376 | <b>&lt;0.001</b> | 0.226         | 0.432 | 0.601            | 0.119            | 0.084 | 0.157            |
| <b>Depression - severe</b>           | 16.931                    | 1.122 | <b>&lt;0.001</b> | -2.434        | 0.836 | <b>0.004</b>     | 0.204            | 0.086 | <b>0.017</b>     |
| <b>Anxiety - low</b>                 | 2.547                     | 0.153 | <b>&lt;0.001</b> | -0.052        | 0.091 | 0.565            | -0.013           | 0.015 | 0.375            |
| <b>Anxiety - moderate/increasing</b> | 14.045                    | 0.650 | <b>&lt;0.001</b> | -0.646        | 0.247 | <b>0.009</b>     | 0.107            | 0.048 | <b>0.025</b>     |
| <b>Anxiety - moderate/decreasing</b> | 13.753                    | 0.976 | <b>&lt;0.001</b> | -3.529        | 0.549 | <b>&lt;0.001</b> | 0.336            | 0.076 | <b>&lt;0.001</b> |
| <b>Anxiety - mild</b>                | 4.848                     | 0.388 | <b>&lt;0.001</b> | 2.715         | 0.471 | <b>&lt;0.001</b> | -0.324           | 0.101 | <b>0.001</b>     |

Depression trajectories based on scores on the Patient Health Questionnaire-9 scale, anxiety trajectories based on scores on the Generalized Anxiety Disorder-7 scale

**Table 3. Multinomial logistic regressions testing predictors of class membership for symptoms of depression (PHQ-9) and of anxiety (GAD-7) trajectories: odds ratios with 95% confidence intervals (models identical to box 5 but with different reference category)**

| Characteristic                                 | PHQ-9 score trajectory class |                             | GAD-7 score trajectory class |                                          |                                       |
|------------------------------------------------|------------------------------|-----------------------------|------------------------------|------------------------------------------|---------------------------------------|
|                                                | Low v moderate               | Severe/declining v moderate | Low v moderate/increasing    | Moderate/declining v moderate/increasing | Mild/increasing v moderate/increasing |
| Age (per year)                                 | <b>1.02 (1.01–1.04)</b>      | 1.00 (0.98–1.02)            | <b>1.05 (1.03–1.06)</b>      | <b>1.03 (1.01–1.06)</b>                  | <b>1.03 (1.01–1.06)</b>               |
| COVID-19-related impairment (WSAS) (per point) | <b>0.96 (0.94–0.99)</b>      | 0.98 (0.95–1.01)            | <b>0.96 (0.93–0.98)</b>      | 1.00 (0.96–1.03)                         | 1.03 (0.99–1.06)                      |
| COVID-19 exposure (per exposure)               | 0.92 (0.73–1.17)             | 0.74 (0.54–1.01)            | 1.06 (0.83–1.36)             | 1.02 (0.71–1.46)                         | 0.92 (0.66–1.28)                      |
| Education (per year)                           | 1.04 (0.91–1.18)             | 1.06 (0.90–1.25)            | <b>1.15 (1.01–1.32)</b>      | 1.11 (0.92–1.35)                         | 1.14 (0.96–1.35)                      |
| Lost job                                       | 0.97 (0.52–1.79)             | 1.17 (0.55–2.50)            | 0.76 (0.41–1.39)             | <b>0.32 (0.11–0.93)</b>                  | <b>0.36 (0.15–0.89)</b>               |
| Work from home                                 | 1.06 (0.52–2.15)             | 2.02 (0.87–4.68)            | 0.98 (0.47–2.03)             | <b>2.57 (1.02–6.48)</b>                  | 1.03 (0.41–2.59)                      |
| Gender (women)                                 | 0.81 (0.53–1.25)             | 0.75 (0.44–1.28)            | 1.05 (0.68–1.62)             | <b>2.28 (1.17–4.45)</b>                  | 0.74 (0.42–1.30)                      |
| Any physical disease                           | 1.01 (0.61–1.69)             | 1.06 (0.56–2.01)            | 0.86 (0.51–1.45)             | 0.54 (0.25–1.18)                         | 0.84 (0.43–1.65)                      |
| Any neurological disease                       | <b>0.51 (0.28–0.92)</b>      | 0.54 (0.25–1.17)            | <b>0.45 (0.24–0.84)</b>      | 1.25 (0.50–3.09)                         | 0.61 (0.26–1.40)                      |
| Any mental disorder                            | <b>0.20 (0.13–0.32)</b>      | 0.86 (0.48–1.52)            | <b>0.19 (0.12–0.30)</b>      | 0.65 (0.32–1.29)                         | <b>0.42 (0.23–0.78)</b>               |
| Have partner                                   | 1.13 (0.70–1.82)             | 0.88 (0.49–1.58)            | 0.87 (0.53–1.41)             | 1.32 (0.62–2.79)                         | 0.83 (0.44–1.55)                      |
| Live alone                                     | 0.63 (0.32–1.24)             | 0.77 (0.32–1.86)            | 0.71 (0.34–1.46)             | 0.58 (0.17–1.93)                         | 0.38 (0.13–1.08)                      |
| Live with children                             | 1.21 (0.75–1.94)             | 1.17 (0.65–2.12)            | 1.08 (0.67–1.73)             | 1.02 (0.51–2.02)                         | 0.97 (0.53–1.78)                      |
| Affected by bushfire smoke                     | 0.99 (0.65–1.50)             | 1.31 (0.78–2.22)            | 0.82 (0.53–1.26)             | <b>0.36 (0.19–0.69)</b>                  | 0.78 (0.45–1.36)                      |
| Affected by bushfire fire                      | 1.95 (0.88–4.31)             | <b>2.95 (1.24–7.04)</b>     | 0.77 (0.41–1.45)             | <b>0.17 (0.04–0.80)</b>                  | 0.70 (0.30–1.65)                      |
| Affected by other adversity                    | <b>0.52 (0.33–0.81)</b>      | 1.19 (0.68–2.08)            | <b>0.53 (0.33–0.84)</b>      | 0.99 (0.50–1.97)                         | 0.84 (0.46–1.53)                      |
| COVID-19-related financial distress            | <b>0.30 (0.19–0.48)</b>      | 0.63 (0.35–1.13)            | <b>0.38 (0.24–0.61)</b>      | 1.49 (0.75–2.97)                         | 0.58 (0.32–1.06)                      |

COVID-19 = coronavirus disease 2019; GAD-7 = Generalised Anxiety Disorder-7; PHQ-9 = Patient Health Questionnaire-9; WSAS = Work and Social Adjustment Scale.
